# Supplementary figures and images for: Molecular detection of Candidatus Rickettsia colombianensi in ticks (Acari, Ixodidae) collected from herpetofauna in San Juan de Carare, Colombia
Source: PubMed Central journal article supplement — Int J Parasitol Parasites Wildl. 2022 Aug 28;19:110–4. doi: 10.1016/j.ijppaw.2022.08.004 (PMC9474317; doi:10.1016/j.ijppaw.2022.08.004), 2022-08-28

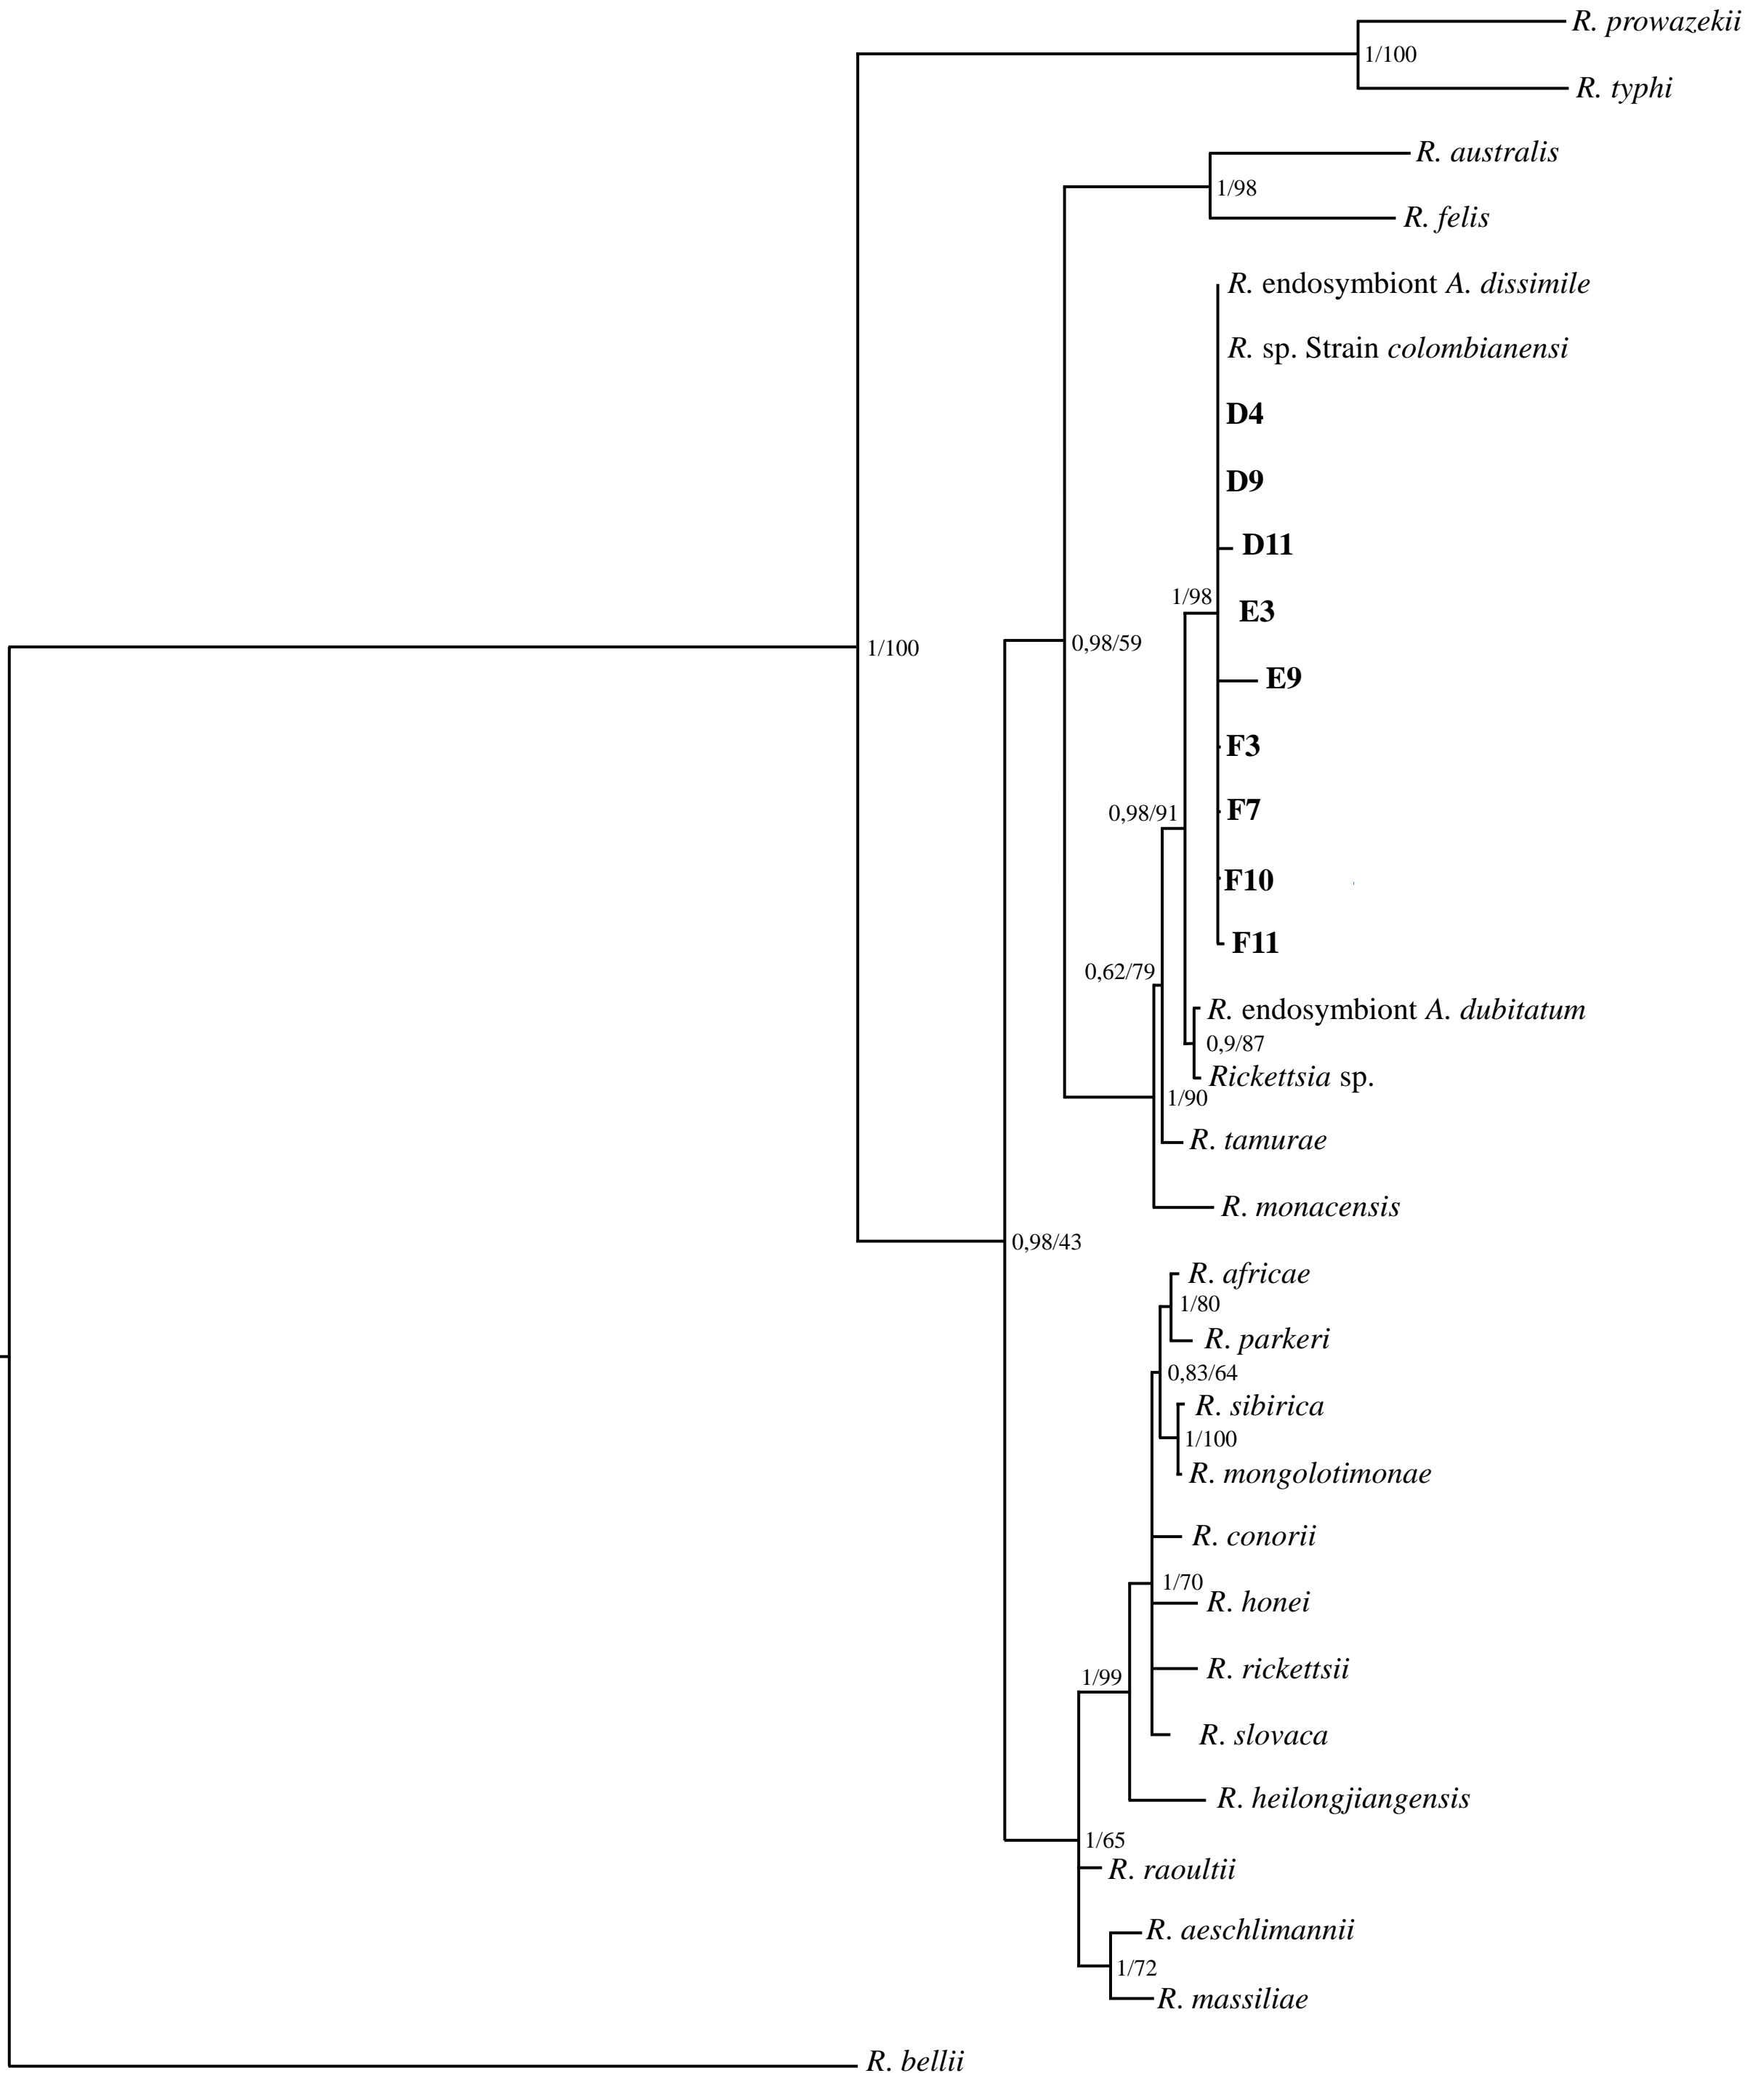

0.04

Supplement: mmc2.pdf [file mmc2.pdf]
